# Supplementary material for: Synthesis, Properties, and Biodegradability of Thermoplastic Elastomers Made from 2-Methyl-1,3-propanediol, Glutaric Acid and Lactide
Source: MDPI journal article supplement (doi:10.3390/life11010043), 2021-01-12
Supplement: s1 [file s1]

Supplementary Materials

# Synthesis, Properties, and Biodegradability of Thermoplastic Elastomers Made from 2-Methyl-1,3-Propanediol, Glutaric Acid and Lactide

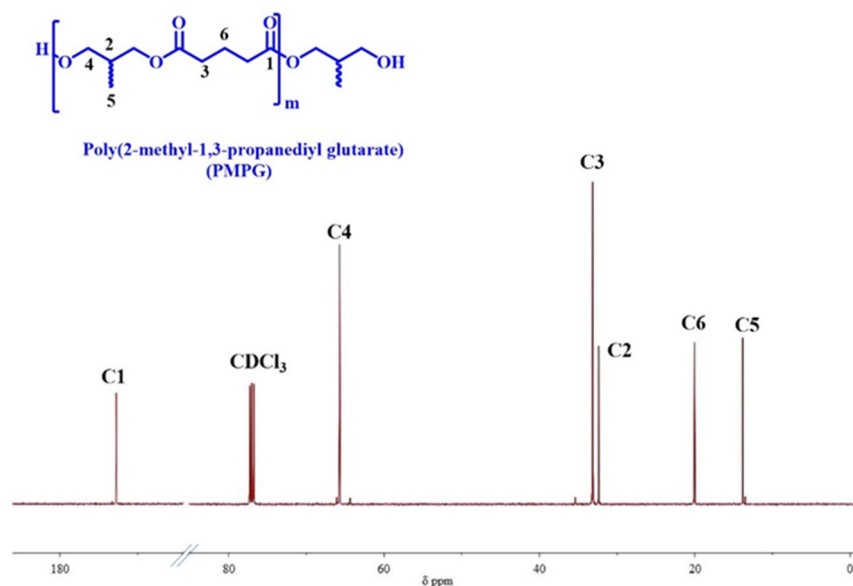

Figure S1.  $^{13}\text{C}$ -NMR spectrum of PMPG-1.

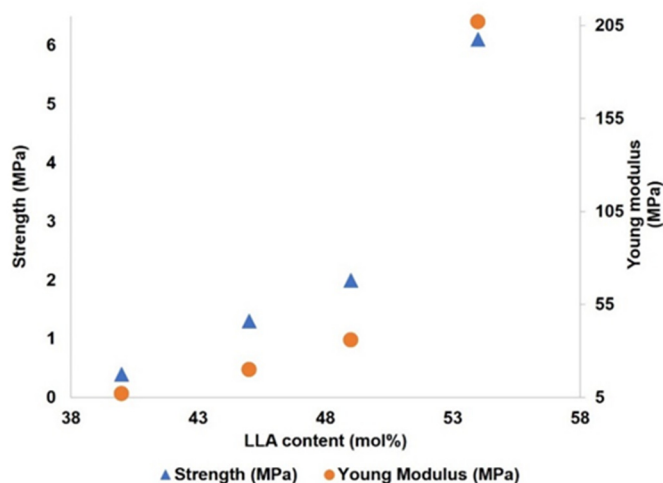

Figure S2. Plots of tensile strength and Young Modulus of the TPEs vs. LA content.

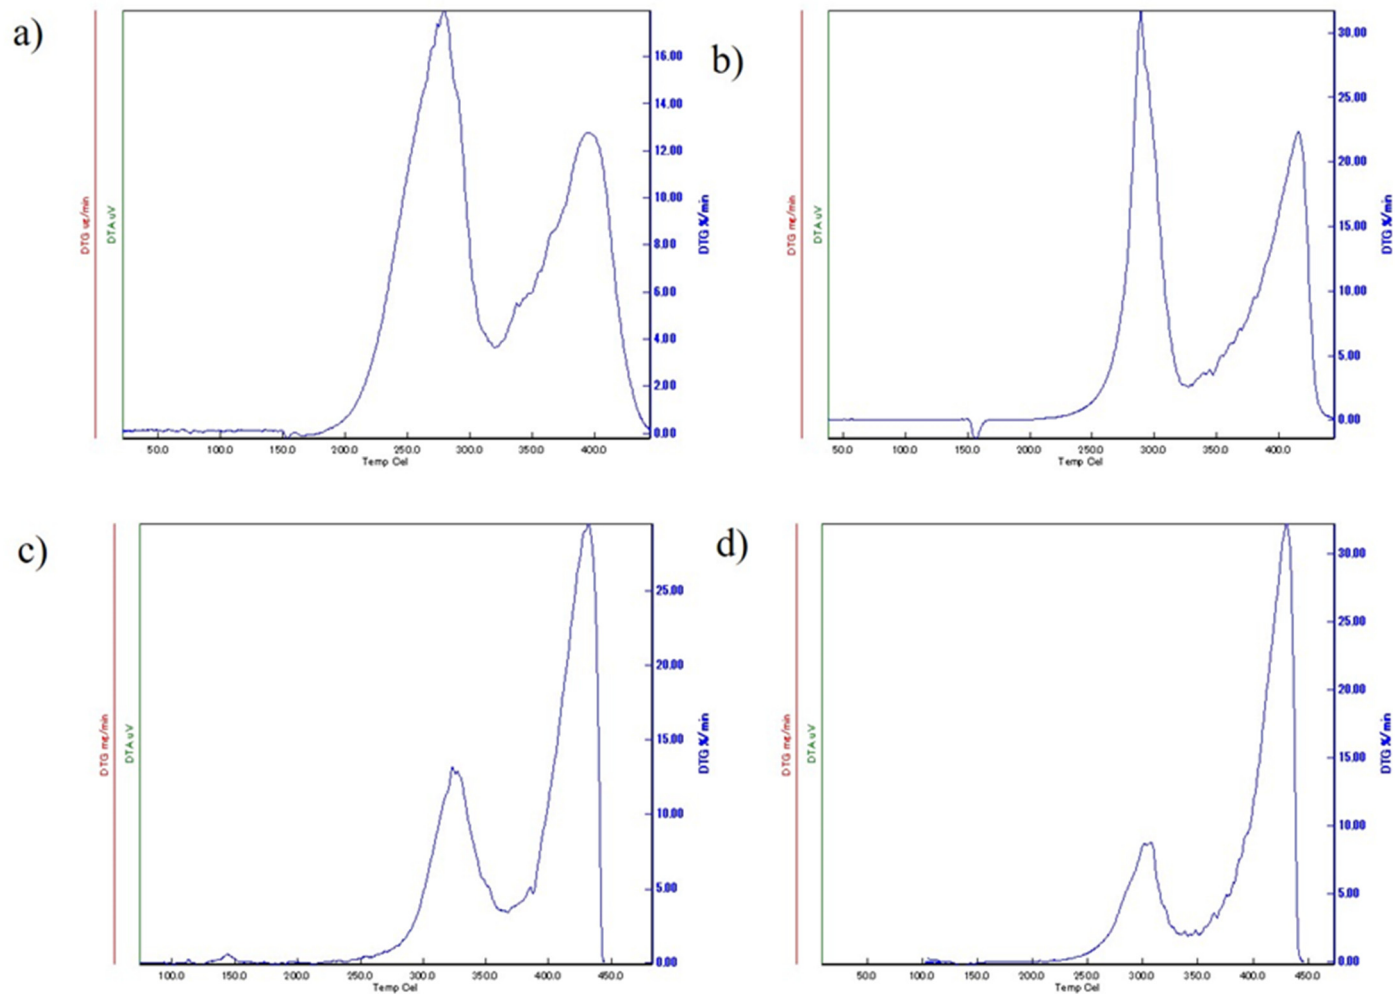

Figure S3. DTG (%/min) curves of (a) TPE100, (b) TPE75 (c) TPE50 (d) TPE25.
